# Supplementary material
Source: PubMed Central journal article supplement (PMC3160495)

# Supplementary Figure 1

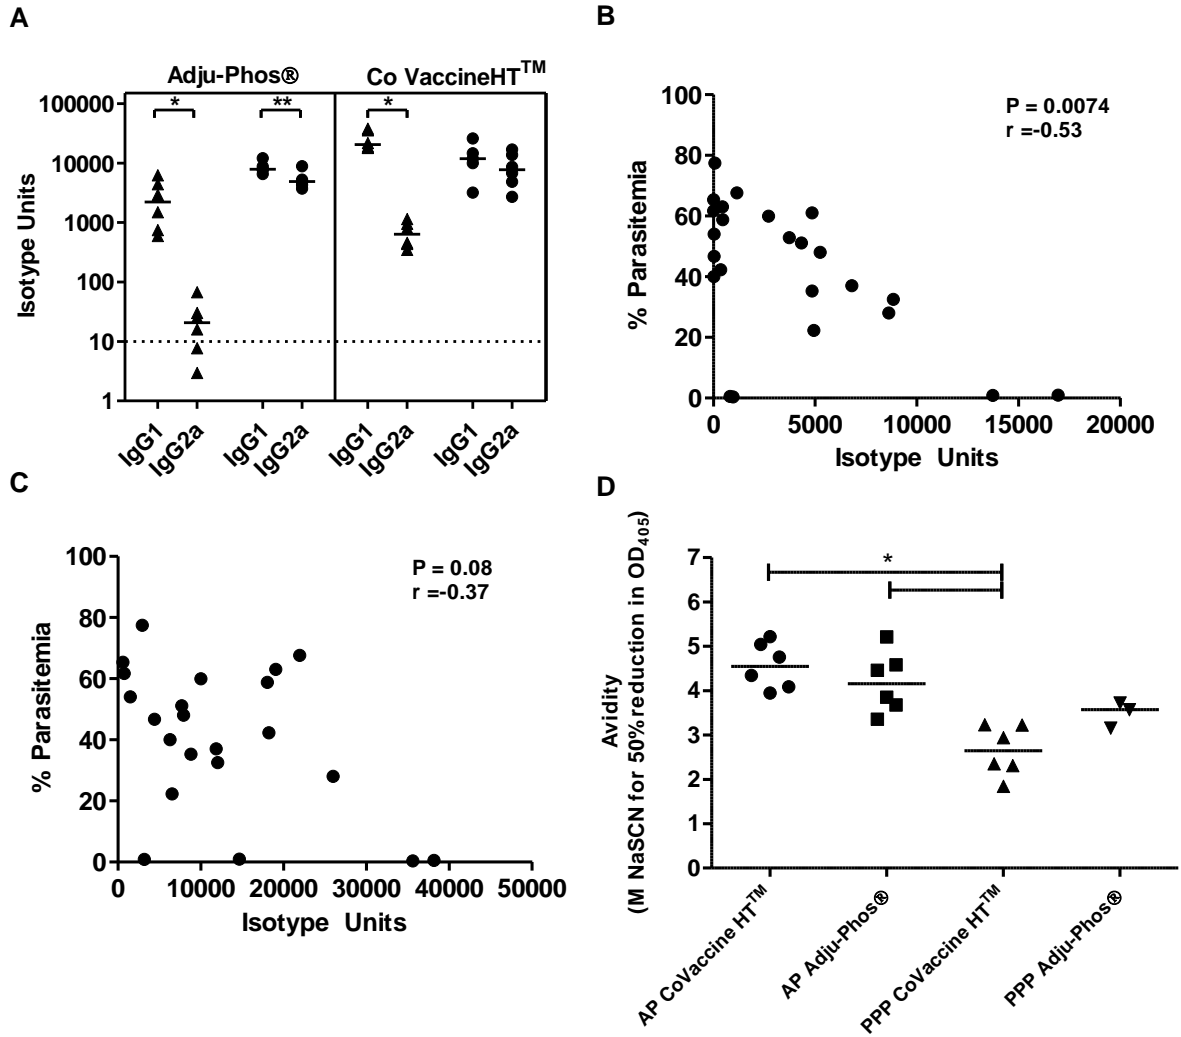

Supplement: NIHMS35952-supplement-2.pdf [file NIHMS35952-supplement-2.pdf]
